# Supplementary material for: Estrogens regulate glycosylation of IgG in women and men
Source: JCI journal article supplement (doi:10.1172/jci.insight.89703), 2017-02-16

## **Supplemental Figure Legends**

**Figure S1. G0F in men and G0FB in women and men from the ORCADES cohort.** A. IgG-specific G0F from 207 men in the ORCADES cohort, divided at age 50. G0F increased with age but no discontinuity was observed at age 50. B. IgG-specific G0FB glycans from 261 females and 207 males from the ORCADES cohort. In both women and men, G0FB increased with age (per year of age,  $\beta = 0.06 \pm 0.01$   $p < 0.0001$  vs.  $\beta = 0.08 \pm 0.01$   $p < 0.0001$ , respectively, by linear regression), but only women demonstrated an increment at age 50 years (women  $\beta = 0.84 \pm 0.30$   $p = 0.005$ , men  $\beta = 0.07 \pm 0.36$   $p = \text{ns}$ ).

**Figure S2. Quantitation of glycan fractions by HPLC of whole serum/plasma.** Brackets indicate major species encompassed under G0, G0F, G0FB, and G1.

**Figure S3. Quantitation of glycan fractions by UPLC of purified IgG.** Major species under each glycoprotein peak (GP) are indicated. The total neutral glycan (Gn) fraction is  $\Sigma(\text{GP1:GP15})$ .  $G0 = (\text{GP1} + \text{GP2} + \text{GP4} + \text{GP6})/\text{Gn}$ ;  $G0F = \text{GP4}/\text{Gn}$ ;  $G0FB = \text{GP6}/\text{Gn}$  (97% of glycan in GP6 is G0FB, as per Pučić et al. 2011).

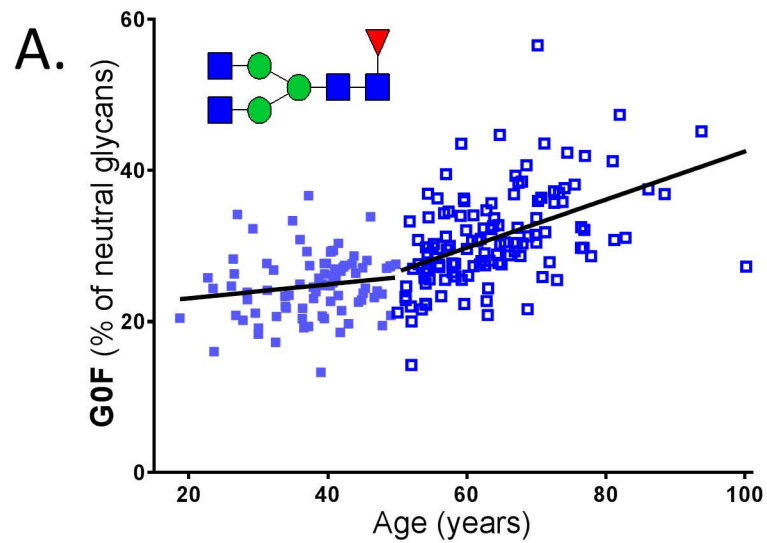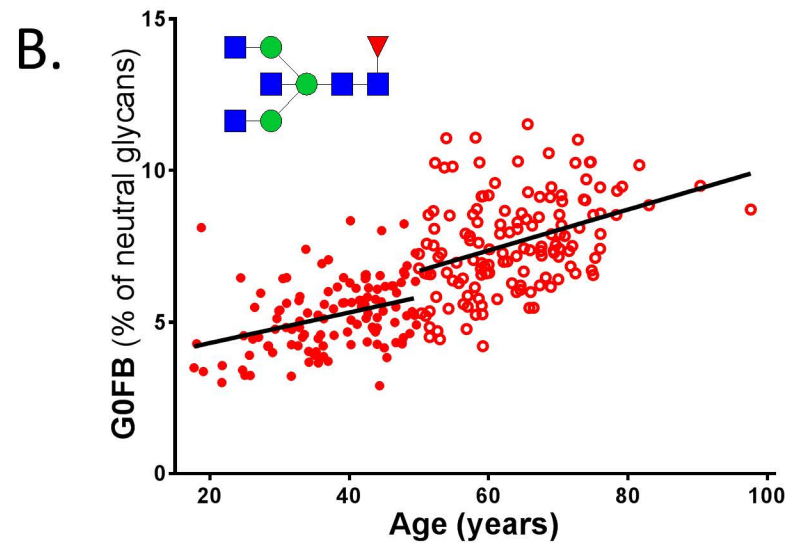

- women <50 y
- women ≥50 y
- men <50 y
- men ≥50 y

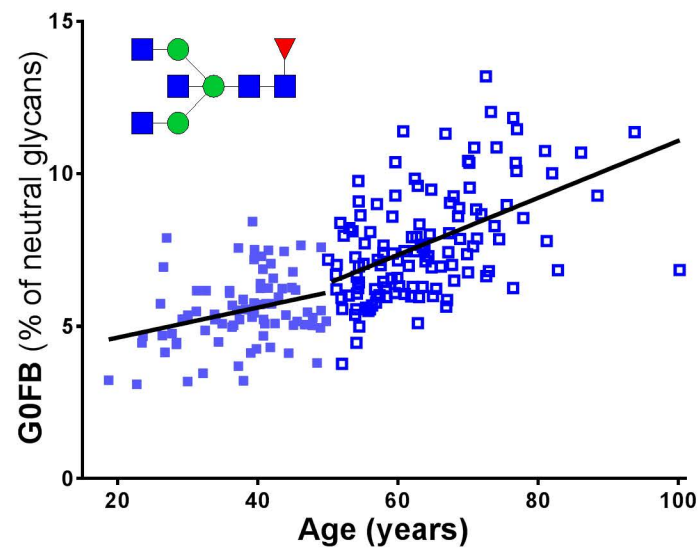

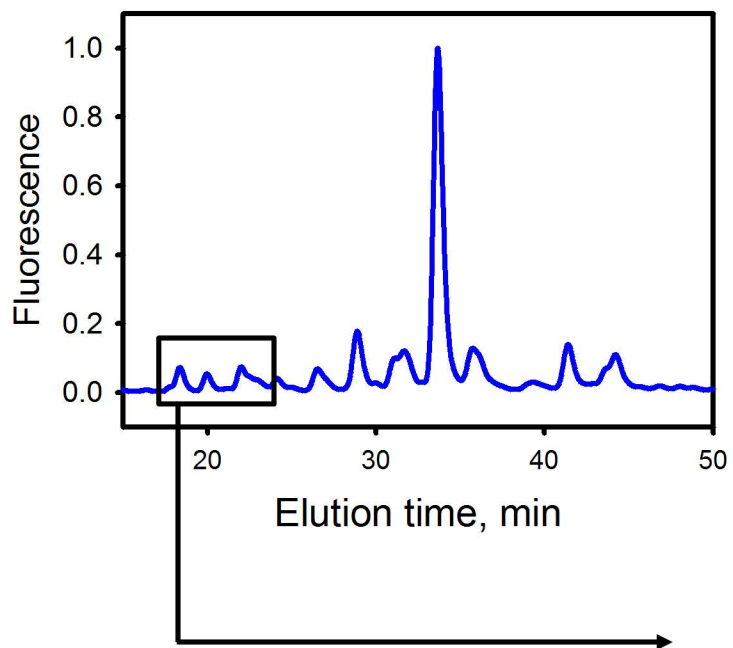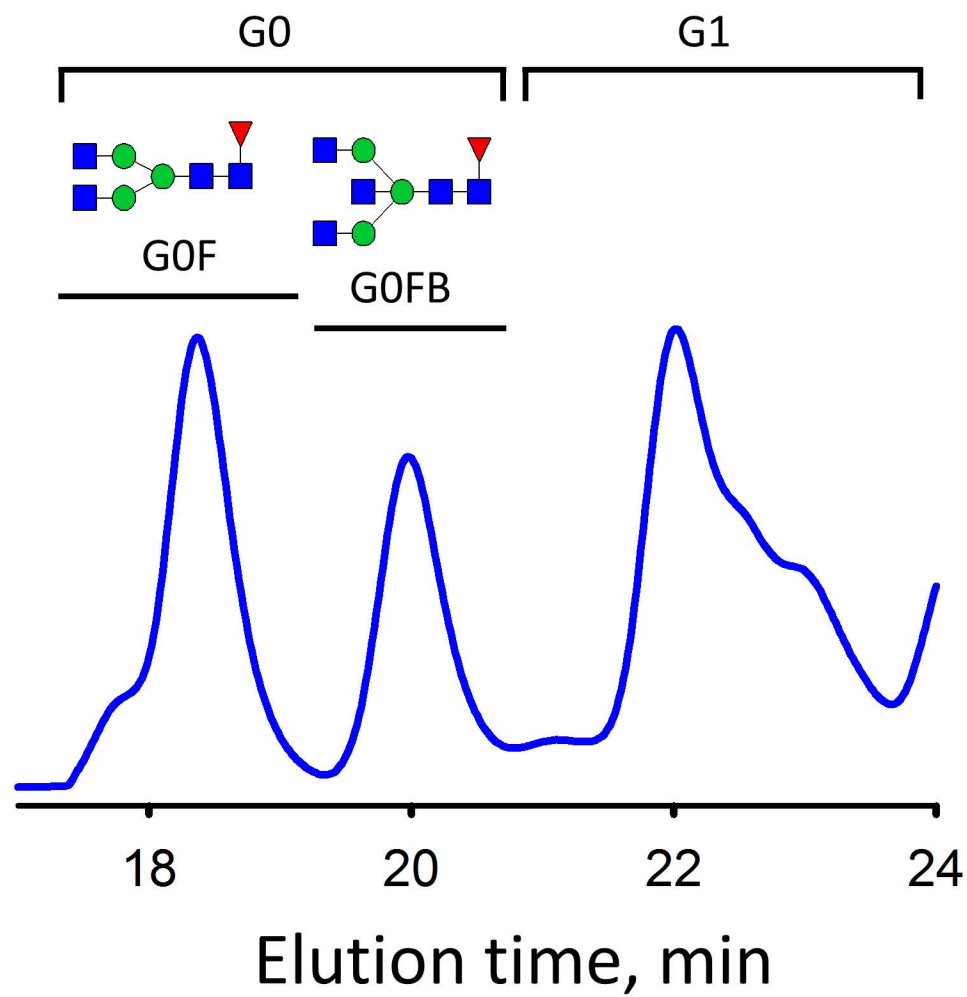

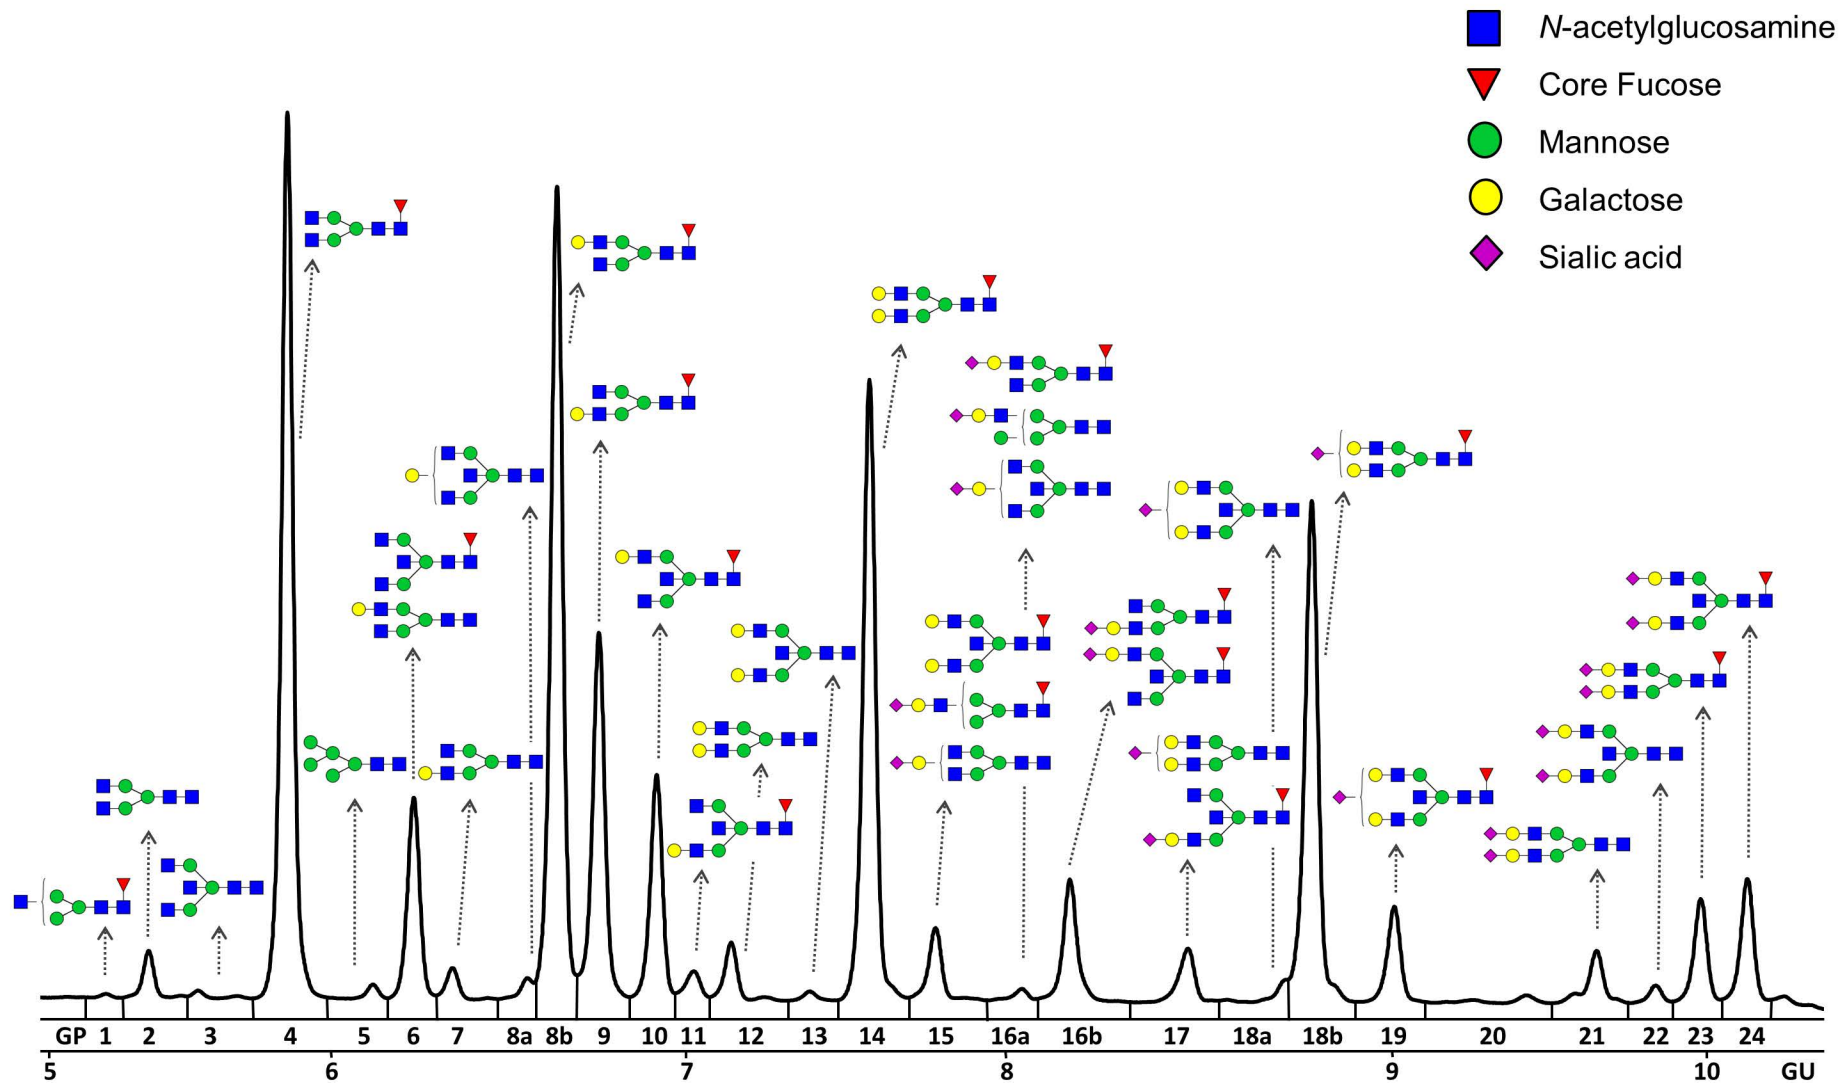

Supplement: sd1 [file 1]
